# Supplementary material for: Thematic Analysis of State Medicaid Buprenorphine Prior Authorization Requirements
Source: PubMed Central journal article supplement (PMC10273019; doi:10.1001/jamanetworkopen.2023.18487), 2023-06-15
Supplement: jamanetwopen-e2318487-s001.pdf [file jamanetwopen-e2318487-s001.pdf]

## Supplemental Online Content

Nguemeni Tiako MJ, Dolan A, Abrams M, Oyekanmi K, Meisel Z, Aronowitz SV.  
Thematic analysis of state Medicaid buprenorphine prior authorization requirements.  
*JAMA Netw Open.* 2023;6(6):e2318487. doi:10.1001/jamanetworkopen.2023.18487

### **eAppendix.** Initial Coding Tool Developed to Assess Prior Authorization Forms

This supplemental material has been provided by the authors to give readers additional information about their work.

**eAppendix.** Initial Coding Tool Developed to Assess Prior Authorization Forms

|                                                                                                                                                         |
|---------------------------------------------------------------------------------------------------------------------------------------------------------|
| 1. Does the state require a patient contract (even if not a separate document, but just questions on the clinician form) along with the clinician form? |
| 2. Does the PA form ask about checking the PDMP?                                                                                                        |
| 3. Are therapy/counseling/groups required?                                                                                                              |
| 3a. Does the form contain language about “patient compliance” with therapy/counseling?                                                                  |
| 3b. Do groups need to be “12-step”?                                                                                                                     |
| 3c. Are there a set number of required sessions?                                                                                                        |
| 4. Is urine drug screen (UDS) required?                                                                                                                 |
| 4a. Random or scheduled UDS?                                                                                                                            |
| 5. Are pill counts required?                                                                                                                            |
| 5a. Random or scheduled?                                                                                                                                |
| 6. Are there questions about dose reduction or evaluation if dose is higher than 16mg?                                                                  |
| 7. Are there additional approvals needed for a dose higher than 16mg?                                                                                   |
| 8. Does the clinician need to be or consult with a specialist?                                                                                          |
| 9. Does the clinician need to be an MD?                                                                                                                 |
| 10. If patient is pregnant, does the clinician need to be board certified OBGYN?                                                                        |
| 10a. Does the form use trans-exclusionary language?                                                                                                     |
| 11. Does the form have any questions about Subutex (buprenorphine only product)?                                                                        |
| 11a. Does a non-pregnant patient need to have an allergy to qualify?                                                                                    |
| <b>If there is a required patient contract:</b>                                                                                                         |
| 1. Does it contain intimidating legal language? (ie remind patients that sharing the medication is illegal or even a felony)                            |
| 2. Does it mention prohibition of concurrent substance use?                                                                                             |
| 3. Are patients banned from seeking care with controlled substances from other clinicians?                                                              |
| 4. Is there language about the goal being to reduce the dose?                                                                                           |
| 5. Does the form contain patient education about the medication?                                                                                        |
| 6. Must the patient agree to UDS and pill counts?                                                                                                       |
| 7. Must the patient agree to pill counts?                                                                                                               |
| 8. Does the contract mention lost/stolen medication?                                                                                                    |
| 8a. Does it state that lost medication will not be replaced?                                                                                            |
| 9. What language is used to describe buprenorphine? (i.e.: “drugs”)                                                                                     |
| <b>Any other note-worthy details or text:</b>                                                                                                           |
