# Supplementary material for: Thematic Analysis of State Medicaid Buprenorphine Prior Authorization Requirements
Source: PubMed Central journal article supplement (PMC10273019; doi:10.1001/jamanetworkopen.2023.18487), 2023-06-15
Supplement: jamanetwopen-e2318487-s002.pdf [file jamanetwopen-e2318487-s002.pdf]

## Data Sharing Statement

Nguemeni Tiako. Thematic Analysis of State Medicaid Buprenorphine Prior Authorization Requirements. *JAMA Netw Open*. Published June 15, 2023.

doi:10.1001/jamanetworkopen.2023.18487

### Data

**Data available:** Yes

**Data types:** Other (please specify)

**Additional Information:** A repository of Medicaid prior authorization forms collected, and a spreadsheet reporting authors' assessment of each state's form

**How to access data:** A repository of Medicaid prior authorization forms collected, and a spreadsheet reporting authors' assessment of each state's form

**When available:** With publication

### Supporting Documents

**Document types:** None

### Additional Information

**Who can access the data:** Anyone requesting the data

**Types of analyses:** qualitative analyses

**Mechanisms of data availability:** with a signed data access agreement

**Any additional restrictions:** n/a
